# Supplementary material for: Targeting CD47/TNFAIP8 by miR-155 overcomes drug resistance and inhibits tumor growth through induction of phagocytosis and apoptosis in multiple myeloma
Source: PubMed Central journal article supplement — Haematologica. 2019 Nov 28;105(12):2813–23. doi: 10.3324/haematol.2019.227579 (PMC7716364; doi:10.3324/haematol.2019.227579), 2019-11-28
Supplement: 2019_227579-Disclosures_Contributions.pdf [file 2019_227579-Disclosures_Contributions.pdf]

Haematologica  
HAEMATOL/2019/227579  
Version 4

Targeting CD47/TNFAIP8 by miR-155 overcomes drug resistance and inhibits tumor growth through induction of phagocytosis and apoptosis in multiple myeloma

Nasrin Rastgoo, Jian Wu, Mariah Liu, Maryam Pourabdollah, Eshetu G. Atenafu, Donna Reece, Weimin Chen, and Hong Chang

Disclosures: No conflict of interest

Contributions: NR, JW, MP performed the research, EA performed statistical analysis, DR provided patients clinical information, ML and WC participated in data analysis. HC designed and supervised the study; NR and HC analyzed the data and wrote the paper.
